# Supplementary material for: Association between Mutuality and Health-Related Quality of Life in Patient–Caregiver Dyads Living with Schizophrenia
Source: PubMed Central journal article supplement (PMC7967568; doi:10.3390/ijerph18052438), 2021-03-02
Supplement: ijerph-18-02438-s001.pdf [file ijerph-18-02438-s001.pdf]

Supplementary Materials

**Table S1.** Characteristics of dyads of patients with schizophrenia and caregivers ( $n=133$ ).

| Characteristic                         | Mean  | SD    | n   | % <sup>b</sup> |
|----------------------------------------|-------|-------|-----|----------------|
| <b>Patient's characteristics</b>       |       |       |     |                |
| Age (years)                            | 45.39 | 9.35  |     |                |
| Gender                                 |       |       |     |                |
| Male                                   |       |       | 75  | 56.4           |
| Female                                 |       |       | 58  | 43.6           |
| Marital status                         |       |       |     |                |
| Unmarried <sup>a</sup>                 |       |       | 113 | 85             |
| Married                                |       |       | 20  | 15             |
| Occupation                             |       |       |     |                |
| Unemployed or retired                  |       |       | 101 | 75.9           |
| Employed                               |       |       | 32  | 24.1           |
| Education                              |       |       |     |                |
| Junior high school or below            |       |       | 49  | 36.8           |
| Senior high school/diploma             |       |       | 66  | 49.6           |
| Bachelor or above                      |       |       | 18  | 13.5           |
| Length of mental illness (years)       | 16.42 | 7.43  |     |                |
| Number of psychiatric hospitalizations | 5.99  | 3.14  |     |                |
| Severity of psychiatric symptom        | 8.48  | 4.03  |     |                |
| <b>Caregiver's characteristics</b>     |       |       |     |                |
| Age (years)                            | 54.98 | 11.84 |     |                |
| Gender                                 |       |       | 46  | 34.6           |
| Male                                   |       |       | 87  | 65.4           |
| Female                                 |       |       |     |                |
| Relationship to the patient            |       |       |     |                |
| Parent                                 |       |       | 59  | 44.4           |
| Spouse                                 |       |       | 9   | 6.8            |
| Sibling                                |       |       | 43  | 32.3           |
| Child/close relative or friend         |       |       | 22  | 16.5           |
| Marital status                         |       |       |     |                |
| Unmarried <sup>a</sup>                 |       |       | 47  | 35.3           |
| Married                                |       |       | 86  | 64.7           |
| Occupation                             |       |       |     |                |
| Unemployed or retired                  |       |       | 53  | 39.8           |
| Employed                               |       |       | 80  | 60.2           |
| Education                              |       |       |     |                |
| Junior high school or below            |       |       | 86  | 64.7           |
| Senior high school/diploma             |       |       | 30  | 22.6           |
| Bachelor or above                      |       |       | 17  | 12.8           |
| Monthly income (NTD)                   |       |       |     |                |
| < 25,000                               |       |       | 69  | 51.9           |
| ≥ 25,000                               |       |       | 64  | 48.1           |

**Table S2.** Mutuality and health-related quality of life (HRQoL) in the dyads of patients and caregivers (n = 133): Differences and relationships.

| Scale                | Scale scores  |               | Differences   |          | Relationships |          |
|----------------------|---------------|---------------|---------------|----------|---------------|----------|
|                      | Patients      | Caregivers    | Between Dyads |          | Between Dyads |          |
|                      | Mean (SD)     | Mean (SD)     | <i>T</i>      | <i>p</i> | <i>r</i>      | <i>p</i> |
| Mutuality            | 2.12 (1.04)   | 1.69 (0.89)   | 5.6           | < .001   | 0.59          | < .001   |
| HRQoL                |               |               |               |          |               |          |
| Total score          | 86.34 (16.08) | 89.75 (15.32) | -2.51         | .013     | 0.56          | < .001   |
| Domains              |               |               |               |          |               |          |
| Physical health      | 12.79 (2.49)  | 13.65 (2.74)  | -3.12         | .002     | 0.26          | .003     |
| Psychological health | 12.23 (2.43)  | 12.33 (2.28)  | -0.42         | .672     | 0.26          | .002     |
| Social relationships | 11.82 (2.93)  | 12.96 (2.28)  | -4.57         | < .001   | 0.41          | < .001   |
| Environment          | 12.15 (2.9)   | 12.62 (2.24)  | -2.16         | .033     | 0.54          | < .001   |

Note: SD = standard deviation; *r* = Pearson's product-moment correlation coefficient.
